# Supplementary material for: The significance of nano-shapes in nanoparticle-enhanced laser-induced breakdown spectroscopy
Source: Royal Society of Chemistry journal article supplement (doi:10.1039/d0ja00329h), 2020-01-01
Supplement: d0ja00329h1.pdf [file d0ja00329h1.pdf]

Supporting information

**Table 1S.** Calculations of volume, mass of NPs, number of concentration, molarity and total surface atoms of the prepared Ag/AgCl NPs in different shapes.

|                                                                                                                                  | AgCl NS                                                                       | AgCl NC                                                        | AgCl NW                                                                    |
|----------------------------------------------------------------------------------------------------------------------------------|-------------------------------------------------------------------------------|----------------------------------------------------------------|----------------------------------------------------------------------------|
| Volume of NPs                                                                                                                    | $V = 4/3(\pi r^3)$<br>$= 4/3(\pi(95)^3)$<br>$= 3.59 \times 10^6 \text{ nm}^3$ | $V = d^3$<br>$= (145)^3$<br>$= 3.048 \times 10^6 \text{ nm}^3$ | $V = \pi r^2 l$<br>$= \pi(40)^2 720$<br>$= 3.619 \times 10^6 \text{ nm}^3$ |
| Mass of NPs: $m = V\rho$<br>$\rho$ : density of AgCl<br>NPs = $1.038 \text{ g/cm}^3$                                             | $3.726 \times 10^{-15} \text{ g}$                                             | $3.163824 \times 10^{-15} \text{ g}$                           | $3.756 \times 10^{-15} \text{ g}$                                          |
| Number concentration of NPs: $N = M_C / m$<br>$M_C$ (mass concentration of AgCl) = $25 \mu\text{g/mL}$ ,<br>m is the mass of NPs | $6.7 \times 10^9$<br>particles/mL                                             | $7.9 \times 10^9$<br>particles/mL                              | $6.65 \times 10^9$<br>particles/mL                                         |
| The nanoparticles molarity:<br>$M = N / 6.02 \times 10^{23}$                                                                     | $1.113 \times 10^{-11} \text{ M}$                                             | $1.312 \times 10^{-11} \text{ M}$                              | $1.105 \times 10^{-11} \text{ M}$                                          |
| Total surface atoms = $\text{Volume}/4(\text{lattice constant})^3$                                                               | $13.21 \times 10^6$                                                           | $11.22 \times 10^6$                                            | $13.32 \times 10^6$                                                        |

**Table 2S.** The FWHM of the emission lines for the three employed samples (Al, Zn and Si)

| Shape              | Al            |               | Zn            |               | Si            |               |
|--------------------|---------------|---------------|---------------|---------------|---------------|---------------|
|                    | 308.24 (I) nm | 309.29 (I) nm | 472.20 (I) nm | 481.07 (I) nm | 288.16 (I) nm | 390.54 (I) nm |
| <b>Without NPs</b> | 0.21          | 0.27          | 0.1207        | 0.1207        | 0.1086        | 0.1176        |
| <b>Nanospheres</b> | 0.1186        | 0.1304        | 0.1659        | 0.1509        | 0.1086        | 0.1086        |
| <b>Nanocubes</b>   | 0.1324        | 0.1422        | 0.1809        | 0.166         | 0.1121        | 0.1087        |
| <b>Nanowires</b>   | 0.1421        | 0.1541        | 0.181         | 0.1659        | 0.1086        | 0.1087        |
